# Supplementary material for: Origin of Ferroelectricity in BiFeO3-Based Solid Solutions
Source: MDPI journal article supplement (doi:10.3390/nano12234163), 2022-11-24
Supplement: s1 [file s1]

**Table S1.** Empirical formula, space group, numbers of Bi and La, and bond lengths of Bi-Fe in the unit cells of the rhombohedral cells.

| Empirical Formula                                   | Z | Space Group <sup>1)</sup> | Number of Bi | Number of La | La content (x) | Bond Length of Bi-Fe / nm |                          |
|-----------------------------------------------------|---|---------------------------|--------------|--------------|----------------|---------------------------|--------------------------|
|                                                     |   |                           |              |              |                | 1 <sup>st</sup> Shortest  | 2 <sup>nd</sup> Shortest |
| BiFeO <sub>3</sub>                                  | 6 | <i>R</i> 3                | 6            | 0            | 0              | 0.3063                    | 0.3286                   |
| (Bi <sub>5</sub> La)Fe <sub>6</sub> O <sub>18</sub> | 1 | <i>P</i> 3                | 5            | 1            | 1/6            | 0.3058                    | 0.3286                   |
|                                                     |   |                           |              |              |                | 0.3102                    | 0.3282                   |
| (Bi <sub>2</sub> La)Fe <sub>3</sub> O <sub>9</sub>  | 2 | <i>P</i> 3                | 4            | 2            | 2/6            | 0.3058                    | 0.3286                   |
|                                                     |   |                           |              |              |                | 0.3101                    | 0.3298                   |
|                                                     |   |                           |              |              |                | 0.3102                    | 0.3282                   |
|                                                     |   |                           |              |              |                | 0.3113                    | 0.3299                   |
| (BiLa)Fe <sub>2</sub> O <sub>6</sub>                | 3 | <i>R</i> 3                | 3            | 3            | 3/6            | 0.3089                    | 0.3293                   |
| (BiLa <sub>2</sub> )Fe <sub>3</sub> O <sub>9</sub>  | 2 | <i>P</i> 3                | 2            | 4            | 4/6            | 0.3113                    | 0.3291                   |
|                                                     |   |                           |              |              |                | 0.3119                    | 0.3311                   |
| (BiLa <sub>5</sub> )Fe <sub>6</sub> O <sub>18</sub> | 1 | <i>P</i> 3                | 1            | 5            | 5/6            | 0.3213                    | 0.3338                   |
| LaFeO <sub>3</sub>                                  | 6 | <i>R</i> 3                | 0            | 6            | 1              | 0.3315 <sup>2)</sup>      | 0.3327 <sup>2)</sup>     |

<sup>1)</sup> Taking account of the antiferromagnetic spin configuration.

<sup>2)</sup> La-Fe length.

**Table S2.** Empirical formula, space group, numbers of Bi and La, and bond lengths of Bi-Fe in the unit cells of the tetragonal cells.

| Empirical Formula                                                 | Z | Space Group <sup>1)</sup> | Number of Bi | Number of La | La content (x) | Bond Length of Bi-Fe / nm |                          |
|-------------------------------------------------------------------|---|---------------------------|--------------|--------------|----------------|---------------------------|--------------------------|
|                                                                   |   |                           |              |              |                | 1 <sup>st</sup> Shortest  | 2 <sup>nd</sup> Shortest |
| BiFeO <sub>3</sub>                                                | 2 | <i>P4mm</i>               | 2            | 0            | 0              | 0.3317                    | 0.3735                   |
|                                                                   |   |                           |              |              |                | 0.3321                    | 0.3742                   |
|                                                                   |   |                           |              |              |                | 0.3315                    | 0.3730                   |
|                                                                   |   |                           |              |              |                | 0.3293                    | 0.3784                   |
| (Bi <sub>7</sub> La)Fe <sub>8</sub> O <sub>24</sub>               | 1 | <i>P4mm</i>               | 7            | 1            | 1/8            | 0.3309                    | 0.3729                   |
|                                                                   |   |                           |              |              |                | 0.3318                    | 0.3711                   |
|                                                                   |   |                           |              |              |                | 0.3323                    | 0.3722                   |
|                                                                   |   |                           |              |              |                | 0.3290                    | 0.3764                   |
| (Bi <sub>3</sub> La)Fe <sub>4</sub> O <sub>12</sub>               | 2 | <i>P4mm</i>               | 6            | 2            | 2/8            | 0.3290                    | 0.3764                   |
|                                                                   |   |                           |              |              |                | 0.3323                    | 0.3722                   |
|                                                                   |   |                           |              |              |                | 0.3256                    | 0.3477                   |
|                                                                   |   |                           |              |              |                | 0.3157                    | 0.3650                   |
| (Bi <sub>5</sub> La <sub>3</sub> )Fe <sub>8</sub> O <sub>24</sub> | 1 | <i>P4mm</i>               | 5            | 3            | 3/8            | 0.3225                    | 0.3546                   |
|                                                                   |   |                           |              |              |                | 0.3238                    | 0.3585                   |
|                                                                   |   |                           |              |              |                | 0.3178                    | 0.3640                   |
|                                                                   |   |                           |              |              |                | 0.3178                    | 0.3640                   |
| (Bi <sub>3</sub> La <sub>5</sub> )Fe <sub>8</sub> O <sub>24</sub> | 1 | <i>P4mm</i>               | 3            | 5            | 5/8            | 0.3235                    | 0.3573                   |
|                                                                   |   |                           |              |              |                | 0.3189                    | 0.3594                   |
| (BiLa <sub>7</sub> )Fe <sub>8</sub> O <sub>24</sub>               | 1 | <i>P4mm</i>               | 1            | 7            | 7/8            | 0.3233                    | 0.3532                   |
| LaFeO <sub>3</sub>                                                | 2 | <i>P4mm</i>               | 0            | 2            | 1              | 0.3346 <sup>2)</sup>      | 0.3369 <sup>2)</sup>     |

<sup>1)</sup> Taking account of the antiferromagnetic spin configuration.<sup>2)</sup> La-Fe length.

**Table S3.** Empirical formula, space group, numbers of Bi and La, and bond lengths of Bi-Fe in the unit cells of the orthorhombic cells.

| Empirical Formula                    | <i>Z</i> | Space Group <sup>1)</sup> | Number of Bi | Number of La | La content ( <i>x</i> ) | Bond Length of Bi-Fe / nm |                          |
|--------------------------------------|----------|---------------------------|--------------|--------------|-------------------------|---------------------------|--------------------------|
|                                      |          |                           |              |              |                         | 1 <sup>st</sup> Shortest  | 2 <sup>nd</sup> Shortest |
| BiFeO <sub>3</sub>                   | 4        | <i>P2<sub>1</sub>m</i>    | 4            | 0            | 0                       | 0.3182                    | 0.3298                   |
|                                      |          |                           |              |              |                         | 0.3182                    | 0.3298                   |
| (BiLa)Fe <sub>2</sub> O <sub>6</sub> | 2        | <i>P2<sub>1</sub>m</i>    | 2            | 2            | 1/2                     | 0.3186                    | 0.3325                   |
| LaFeO <sub>3</sub>                   | 4        | <i>P2<sub>1</sub>m</i>    | 0            | 4            | 1                       | 0.3241 <sup>2)</sup>      | 0.3345 <sup>2)</sup>     |
|                                      |          |                           |              |              |                         | 0.3241 <sup>2)</sup>      | 0.3345 <sup>2)</sup>     |

<sup>1)</sup> Taking account of the antiferromagnetic spin configuration.<sup>2)</sup> La-Fe length.

**Table S4.** Structural parameters of the rhombohedral BiFeO<sub>3</sub> cell (space group *R*3) with an antiferromagnetic spin configuration.

| Lattice Parameter |              |                |                        |          |          |                                           |
|-------------------|--------------|----------------|------------------------|----------|----------|-------------------------------------------|
| <i>a</i>          | 0.5528       | nm             | $\alpha$               | 90       | deg.     | Density / Mg m <sup>-3</sup><br><br>8.595 |
| <i>b</i>          | 0.5528       | nm             | $\beta$                | 90       | deg.     |                                           |
| <i>c</i>          | 1.3701       | nm             | $\gamma$               | 120      | deg.     |                                           |
| Element           | Multiplicity | Wyckoff Letter | Fractional Coordinates |          |          | Magnetic Moment<br>/ $\mu_B$              |
|                   |              |                | <i>x</i>               | <i>y</i> | <i>z</i> |                                           |
| Bi1               | 3            | <i>a</i>       | 0.0000                 | 0.0000   | 0.9949   | 0.001                                     |
| Bi2               | 3            | <i>a</i>       | 0.0000                 | 0.0000   | 0.4949   | -0.001                                    |
| Fe1               | 3            | <i>a</i>       | 0.0000                 | 0.0000   | 0.2184   | -4.184                                    |
| Fe2               | 3            | <i>a</i>       | 0.0000                 | 0.0000   | 0.7184   | 4.184                                     |
| O1                | 9            | <i>b</i>       | 0.3171                 | 0.0905   | 0.6209   | -0.024                                    |
| O2                | 9            | <i>b</i>       | 0.4401                 | 0.4239   | 0.4542   | 0.023                                     |

**Table S5** Structural parameters of the rhombohedral (Bi<sub>5</sub>La)Fe<sub>6</sub>O<sub>18</sub> cell (space group *P*3) with an antiferromagnetic spin configuration.

| Lattice Parameter |              |                |                        |          |          |                                           |
|-------------------|--------------|----------------|------------------------|----------|----------|-------------------------------------------|
| <i>a</i>          | 0.5529       | nm             | $\alpha$               | 90       | deg.     | Density / Mg m <sup>-3</sup><br><br>8.333 |
| <i>b</i>          | 0.5528       | nm             | $\beta$                | 90       | deg.     |                                           |
| <i>c</i>          | 1.3509       | nm             | $\gamma$               | 120      | deg.     |                                           |
| Element           | Multiplicity | Wyckoff Letter | Fractional Coordinates |          |          | Magnetic Moment<br>/ $\mu_B$              |
|                   |              |                | <i>x</i>               | <i>y</i> | <i>z</i> |                                           |
| Bi1               | 1            | <i>a</i>       | 0.0000                 | 0.0000   | 0.0071   | 0.0010                                    |
| Bi2               | 1            | <i>b</i>       | 0.3333                 | 0.6667   | 0.6768   | -0.0010                                   |
| Bi3               | 1            | <i>c</i>       | 0.6667                 | 0.3333   | 0.3441   | 0.0020                                    |
| Bi4               | 1            | <i>a</i>       | 0.0000                 | 0.0000   | 0.5118   | 0.0000                                    |
| La1               | 1            | <i>b</i>       | 0.3333                 | 0.6667   | 0.1890   | 0.0050                                    |
| La2               | 1            | <i>c</i>       | 0.6667                 | 0.3333   | 0.8586   | 0.0040                                    |
| Fe1               | 1            | <i>a</i>       | 0.0000                 | 0.0000   | 0.7774   | -4.1730                                   |
| Fe2               | 1            | <i>b</i>       | 0.3333                 | 0.6667   | 0.4504   | -4.1790                                   |
| Fe3               | 1            | <i>c</i>       | 0.6667                 | 0.3333   | 0.1137   | -4.1700                                   |
| Fe4               | 1            | <i>a</i>       | 0.0000                 | 0.0000   | 0.2823   | 4.1780                                    |
| Fe5               | 1            | <i>b</i>       | 0.3333                 | 0.6667   | 0.9507   | 4.1760                                    |
| Fe6               | 1            | <i>c</i>       | 0.6667                 | 0.3333   | 0.6190   | 4.1830                                    |
| O1                | 3            | <i>d</i>       | 0.7532                 | 0.6544   | 0.7089   | -0.0183                                   |
| O2                | 3            | <i>d</i>       | 0.0936                 | 0.3256   | 0.3737   | -0.0107                                   |
| O3                | 3            | <i>d</i>       | 0.4299                 | 0.9943   | 0.0396   | -0.0203                                   |
| O4                | 3            | <i>d</i>       | 0.0937                 | 0.7763   | 0.8775   | 0.0200                                    |
| O5                | 3            | <i>d</i>       | 0.4171                 | 0.4314   | 0.5434   | 0.0010                                    |
| O6                | 3            | <i>d</i>       | 0.7576                 | 0.1073   | 0.2115   | 0.0217                                    |

**Table S6.** Structural parameters of the rhombohedral (Bi<sub>2</sub>La)Fe<sub>3</sub>O<sub>9</sub> cell (space group *P*3) with an antiferromagnetic spin configuration.

| Lattice Parameter |              |                |                        |          |          |                                           |
|-------------------|--------------|----------------|------------------------|----------|----------|-------------------------------------------|
| <i>a</i>          | 0.552877     | nm             | $\alpha$               | 90       | deg.     | Density / Mg m <sup>-3</sup><br><br>8.065 |
| <i>b</i>          | 0.552877     | nm             | $\beta$                | 90       | deg.     |                                           |
| <i>c</i>          | 1.350915     | nm             | $\gamma$               | 120      | deg.     |                                           |
| Element           | Multiplicity | Wyckoff Letter | Fractional Coordinates |          |          | Magnetic Moment<br>/ $\mu_B$              |
|                   |              |                | <i>x</i>               | <i>y</i> | <i>z</i> |                                           |
| Bi1               | 1            | <i>a</i>       | 0.0000                 | 0.0000   | 0.0071   | 0.0010                                    |
| Bi2               | 1            | <i>b</i>       | 0.3333                 | 0.6667   | 0.6768   | -0.0010                                   |
| Bi3               | 1            | <i>c</i>       | 0.6667                 | 0.3333   | 0.3441   | 0.0020                                    |
| Bi4               | 1            | <i>a</i>       | 0.0000                 | 0.0000   | 0.5118   | 0.0000                                    |
| La1               | 1            | <i>b</i>       | 0.3333                 | 0.6667   | 0.1890   | 0.0050                                    |
| La2               | 1            | <i>c</i>       | 0.6667                 | 0.3333   | 0.8586   | 0.0040                                    |
| Fe1               | 1            | <i>a</i>       | 0.0000                 | 0.0000   | 0.7774   | -4.1730                                   |
| Fe2               | 1            | <i>b</i>       | 0.3333                 | 0.6667   | 0.4504   | -4.1790                                   |
| Fe3               | 1            | <i>c</i>       | 0.6667                 | 0.3333   | 0.1137   | -4.1700                                   |
| Fe4               | 1            | <i>a</i>       | 0.0000                 | 0.0000   | 0.2823   | 4.1780                                    |
| Fe5               | 1            | <i>b</i>       | 0.3333                 | 0.6667   | 0.9507   | 4.1760                                    |
| Fe6               | 1            | <i>c</i>       | 0.6667                 | 0.3333   | 0.6190   | 4.1830                                    |
| O1                | 3            | <i>d</i>       | 0.7532                 | 0.6544   | 0.7089   | -0.0183                                   |
| O2                | 3            | <i>d</i>       | 0.0936                 | 0.3256   | 0.3737   | -0.0107                                   |
| O3                | 3            | <i>d</i>       | 0.4299                 | 0.9943   | 0.0396   | -0.0203                                   |
| O4                | 3            | <i>d</i>       | 0.0937                 | 0.7763   | 0.8775   | 0.0200                                    |
| O5                | 3            | <i>d</i>       | 0.4171                 | 0.4314   | 0.5434   | 0.0010                                    |
| O6                | 3            | <i>d</i>       | 0.7576                 | 0.1073   | 0.2115   | 0.0217                                    |

**Table S7.** Structural parameters of the rhombohedral (BiLa)Fe<sub>2</sub>O<sub>6</sub> cell (space group *R*3) with an antiferromagnetic spin configurations.

| Lattice Parameters |              |                |                        |          |          |                                           |
|--------------------|--------------|----------------|------------------------|----------|----------|-------------------------------------------|
| <i>a</i>           | 0.5532       | nm             | $\alpha$               | 90       | deg.     | Density / Mg m <sup>-3</sup><br><br>7.779 |
| <i>b</i>           | 0.5532       | nm             | $\beta$                | 90       | deg.     |                                           |
| <i>c</i>           | 1.3422       | nm             | $\gamma$               | 120      | deg.     |                                           |
| Element            | Multiplicity | Wyckoff Letter | Fractional Coordinates |          |          | Magnetic Moment<br>/ $\mu_B$              |
|                    |              |                | <i>x</i>               | <i>y</i> | <i>z</i> |                                           |
| Bi                 | 3            | <i>a</i>       | 0.0000                 | 0.0000   | 0.9889   | 0.000                                     |
| La                 | 3            | <i>a</i>       | 0.0000                 | 0.0000   | 0.4721   | 0.003                                     |
| Fe1                | 3            | <i>a</i>       | 0.0000                 | 0.0000   | 0.2191   | -4.173                                    |
| Fe2                | 3            | <i>a</i>       | 0.0000                 | 0.0000   | 0.7152   | 4.177                                     |
| O1                 | 9            | <i>b</i>       | 0.9049                 | 0.2348   | 0.6288   | -0.013                                    |
| O2                 | 9            | <i>b</i>       | 0.5750                 | 0.0152   | 0.4566   | 0.011                                     |

**Table S8.** Structural parameters of the rhombohedral (BiLa<sub>2</sub>)Fe<sub>3</sub>O<sub>9</sub> cell (space group *P*3) with an antiferromagnetic spin configuration.

| Lattice Parameter |              |                |                        |          |          |                                           |
|-------------------|--------------|----------------|------------------------|----------|----------|-------------------------------------------|
| <i>a</i>          | 0.5531       | nm             | $\alpha$               | 90       | deg.     | Density / Mg m <sup>-3</sup><br><br>7.490 |
| <i>b</i>          | 0.5531       | nm             | $\beta$                | 90       | deg.     |                                           |
| <i>c</i>          | 1.3361       | nm             | $\gamma$               | 120      | deg.     |                                           |
| Element           | Multiplicity | Wyckoff Letter | Fractional Coordinates |          |          | Magnetic Moment<br>/ $\mu_B$              |
|                   |              |                | <i>x</i>               | <i>y</i> | <i>z</i> |                                           |
| Bi1               | 1            | <i>a</i>       | 0.0000                 | 0.0000   | 0.0160   | 0.0010                                    |
| Bi2               | 1            | <i>b</i>       | 0.3333                 | 0.6667   | 0.6800   | 0.0000                                    |
| La1               | 1            | <i>c</i>       | 0.6667                 | 0.3333   | 0.3603   | -0.0040                                   |
| La2               | 1            | <i>a</i>       | 0.0000                 | 0.0000   | 0.5300   | 0.0020                                    |
| La3               | 1            | <i>b</i>       | 0.3333                 | 0.6667   | 0.1936   | 0.0040                                    |
| La4               | 1            | <i>c</i>       | 0.6667                 | 0.3333   | 0.8680   | 0.0020                                    |
| Fe1               | 1            | <i>a</i>       | 0.0000                 | 0.0000   | 0.7826   | -4.1770                                   |
| Fe2               | 1            | <i>b</i>       | 0.3333                 | 0.6667   | 0.4470   | -4.1650                                   |
| Fe3               | 1            | <i>c</i>       | 0.6667                 | 0.3333   | 0.1183   | -4.1730                                   |
| Fe4               | 1            | <i>a</i>       | 0.0000                 | 0.0000   | 0.2818   | 4.1720                                    |
| Fe5               | 1            | <i>b</i>       | 0.3333                 | 0.6667   | 0.9506   | 4.1740                                    |
| Fe6               | 1            | <i>c</i>       | 0.6667                 | 0.3333   | 0.6204   | 4.1730                                    |
| O1                | 3            | <i>d</i>       | 0.7589                 | 0.6661   | 0.7028   | -0.0020                                   |
| O2                | 3            | <i>d</i>       | 0.0981                 | 0.3283   | 0.3716   | -0.0217                                   |
| O3                | 3            | <i>d</i>       | 0.4282                 | 0.9992   | 0.0360   | -0.0010                                   |
| O4                | 3            | <i>d</i>       | 0.0916                 | 0.7715   | 0.8749   | 0.0063                                    |
| O5                | 3            | <i>d</i>       | 0.4317                 | 0.4385   | 0.5391   | 0.0077                                    |
| O6                | 3            | <i>d</i>       | 0.7581                 | 0.1020   | 0.2076   | 0.0090                                    |

**Table S9.** Structural parameters of the rhombohedral (BiLa<sub>5</sub>)Fe<sub>6</sub>O<sub>18</sub> cell (space group *P*3) with an antiferromagnetic spin configuration.

| Lattice Parameter |              |                |                        |          |          |                                           |
|-------------------|--------------|----------------|------------------------|----------|----------|-------------------------------------------|
| <i>a</i>          | 0.5532       | nm             | $\alpha$               | 90       | deg.     | Density / Mg m <sup>-3</sup><br><br>7.199 |
| <i>b</i>          | 0.5532       | nm             | $\beta$                | 90       | deg.     |                                           |
| <i>c</i>          | 1.3288       | nm             | $\gamma$               | 120      | deg.     |                                           |
| Element           | Multiplicity | Wyckoff Letter | Fractional Coordinates |          |          | Magnetic Moment<br>/ $\mu_B$              |
|                   |              |                | <i>x</i>               | <i>y</i> | <i>z</i> |                                           |
| Bi                | 1            | <i>b</i>       | 0.3333                 | 0.6667   | 0.6918   | 0.0000                                    |
| La1               | 1            | <i>a</i>       | 0.0000                 | 0.0000   | 0.0325   | -0.0010                                   |
| La2               | 1            | <i>c</i>       | 0.6667                 | 0.3333   | 0.3648   | -0.0020                                   |
| La3               | 1            | <i>a</i>       | 0.0000                 | 0.0000   | 0.5352   | 0.0010                                    |
| La4               | 1            | <i>b</i>       | 0.3333                 | 0.6667   | 0.1979   | 0.0010                                    |
| La5               | 1            | <i>c</i>       | 0.6667                 | 0.3333   | 0.8666   | 0.0010                                    |
| Fe1               | 1            | <i>a</i>       | 0.0000                 | 0.0000   | 0.7855   | -4.1740                                   |
| Fe2               | 1            | <i>b</i>       | 0.3333                 | 0.6667   | 0.4500   | -4.1700                                   |
| Fe3               | 1            | <i>c</i>       | 0.6667                 | 0.3333   | 0.1174   | -4.1670                                   |
| Fe4               | 1            | <i>a</i>       | 0.0000                 | 0.0000   | 0.2849   | 4.1690                                    |
| Fe5               | 1            | <i>b</i>       | 0.3333                 | 0.6667   | 0.9493   | 4.1710                                    |
| Fe6               | 1            | <i>c</i>       | 0.6667                 | 0.3333   | 0.6188   | 4.1720                                    |
| O1                | 3            | <i>d</i>       | 0.7583                 | 0.6672   | 0.7015   | 0.0040                                    |
| O2                | 3            | <i>d</i>       | 0.0989                 | 0.3320   | 0.3694   | -0.0060                                   |
| O3                | 3            | <i>d</i>       | 0.4330                 | 0.9983   | 0.0357   | -0.0057                                   |
| O4                | 3            | <i>d</i>       | 0.0941                 | 0.7669   | 0.8709   | 0.0010                                    |
| O5                | 3            | <i>d</i>       | 0.4324                 | 0.4344   | 0.5363   | 0.0037                                    |
| O6                | 3            | <i>d</i>       | 0.7658                 | 0.1010   | 0.2029   | 0.0037                                    |

**Table S10.** Structural parameters of the rhombohedral LaFeO<sub>3</sub> cell (space group *R*3) with an antiferromagnetic spin configuration.

| Lattice Parameter |              |                |                        |          |          |                                           |
|-------------------|--------------|----------------|------------------------|----------|----------|-------------------------------------------|
| <i>a</i>          | 0.5534       | nm             | $\alpha$               | 90       | deg.     | Density / Mg m <sup>-3</sup><br><br>6.865 |
| <i>b</i>          | 0.5534       | nm             | $\beta$                | 90       | deg.     |                                           |
| <i>c</i>          | 1.3285       | nm             | $\gamma$               | 120      | deg.     |                                           |
| Element           | Multiplicity | Wyckoff Letter | Fractional Coordinates |          |          | Magnetic Moment<br>/ $\mu_B$              |
|                   |              |                | <i>x</i>               | <i>y</i> | <i>z</i> |                                           |
| La1               | 3            | <i>a</i>       | 0.0000                 | 0.0000   | 0.9657   | 0.000                                     |
| La2               | 3            | <i>a</i>       | 0.0000                 | 0.0000   | 0.4657   | 0.000                                     |
| Fe1               | 3            | <i>a</i>       | 0.0000                 | 0.0000   | 0.2152   | -4.168                                    |
| Fe2               | 3            | <i>a</i>       | 0.0000                 | 0.0000   | 0.7152   | 4.168                                     |
| O1                | 9            | <i>b</i>       | 0.9007                 | 0.2339   | 0.6317   | 0.000                                     |
| O2                | 9            | <i>b</i>       | 0.5673                 | 0.0001   | 0.4650   | 0.000                                     |

**Table S11.** Structural parameters of the tetragonal BiFeO<sub>3</sub> cell (space group  $P4mm$ ) with an antiferromagnetic spin configuration.

| Lattice Parameter |              |                |                        |        |        |                                       |
|-------------------|--------------|----------------|------------------------|--------|--------|---------------------------------------|
| $a$               | 0.3724       | nm             | $\alpha$               | 90     | deg.   | Density / Mg m <sup>-3</sup><br>8.027 |
| $b$               | 0.3724       | nm             | $\beta$                | 90     | deg.   |                                       |
| $c$               | 0.9335       | nm             | $\gamma$               | 90     | deg.   |                                       |
| Element           | Multiplicity | Wyckoff Letter | Fractional Coordinates |        |        | Magnetic Moment<br>/ $\mu_B$          |
|                   |              |                | $x$                    | $y$    | $z$    |                                       |
| Bi1               | 1            | $a$            | 0.0000                 | 0.0000 | 0.5672 | -0.014                                |
| Bi2               | 1            | $a$            | 0.0000                 | 0.0000 | 0.0672 | 0.014                                 |
| Fe1               | 1            | $b$            | 0.5000                 | 0.5000 | 0.7833 | -4.206                                |
| Fe2               | 1            | $b$            | 0.5000                 | 0.5000 | 0.2833 | 4.206                                 |
| O1                | 1            | $b$            | 0.5000                 | 0.5000 | 0.9791 | -0.145                                |
| O2                | 2            | $c$            | 0.5000                 | 0.0000 | 0.7134 | -0.117                                |
| O3                | 1            | $b$            | 0.5000                 | 0.5000 | 0.4791 | 0.145                                 |
| O4                | 2            | $c$            | 0.5000                 | 0.0000 | 0.2134 | 0.117                                 |

**Table S12.** Structural parameters of the tetragonal (Bi<sub>7</sub>La)Fe<sub>8</sub>O<sub>24</sub> cell (space group *P4mm*) with an antiferromagnetic spin configuration.

| Lattice Parameter |              |                |                        |          |          |                                           |
|-------------------|--------------|----------------|------------------------|----------|----------|-------------------------------------------|
| <i>a</i>          | 0.7483       | nm             | $\alpha$               | 90       | deg.     | Density / Mg m <sup>-3</sup><br><br>7.772 |
| <i>b</i>          | 0.7483       | nm             | $\beta$                | 90       | deg.     |                                           |
| <i>c</i>          | 0.9283       | nm             | $\gamma$               | 90       | deg.     |                                           |
| Element           | Multiplicity | Wyckoff Letter | Fractional Coordinates |          |          | Magnetic Moment<br>/ $\mu_B$              |
|                   |              |                | <i>x</i>               | <i>y</i> | <i>z</i> |                                           |
| Bi1               | 1            | <i>a</i>       | 0.0000                 | 0.0000   | 0.4345   | -0.0170                                   |
| Bi2               | 1            | <i>a</i>       | 0.0000                 | 0.0000   | 0.9317   | 0.0070                                    |
| Bi3               | 2            | <i>c</i>       | 0.5000                 | 0.0000   | 0.4276   | -0.0155                                   |
| Bi4               | 2            | <i>c</i>       | 0.5000                 | 0.0000   | 0.9332   | 0.0140                                    |
| Bi5               | 1            | <i>b</i>       | 0.5000                 | 0.5000   | 0.9374   | 0.0170                                    |
| La2               | 1            | <i>b</i>       | 0.5000                 | 0.5000   | 0.4456   | 0.0240                                    |
| Fe1               | 4            | <i>d</i>       | 0.2488                 | 0.2488   | 0.2163   | -4.2100                                   |
| Fe2               | 4            | <i>d</i>       | 0.2517                 | 0.2517   | 0.7191   | 4.2123                                    |
| O1                | 4            | <i>d</i>       | 0.2360                 | 0.2360   | 0.0196   | -0.1430                                   |
| O2                | 4            | <i>e</i>       | 0.2430                 | 0.0000   | 0.2951   | -0.1080                                   |
| O3                | 4            | <i>d</i>       | 0.2718                 | 0.2718   | 0.5233   | 0.1455                                    |
| O4                | 4            | <i>e</i>       | 0.2554                 | 0.0000   | 0.7780   | 0.1203                                    |
| O5                | 4            | <i>f</i>       | 0.2381                 | 0.5000   | 0.2733   | -0.1355                                   |
| O6                | 4            | <i>f</i>       | 0.2549                 | 0.5000   | 0.7948   | 0.1150                                    |

**Table S13.** Structural parameters of the tetragonal (Bi<sub>3</sub>La)Fe<sub>4</sub>O<sub>12</sub> cell (space group *P4mm*) with an antiferromagnetic spin configuration.

| Lattice Parameter |              |                |                        |          |          |                                           |
|-------------------|--------------|----------------|------------------------|----------|----------|-------------------------------------------|
| <i>a</i>          | 0.7516       | nm             | $\alpha$               | 90       | deg.     | Density / Mg m <sup>-3</sup><br><br>7.539 |
| <i>b</i>          | 0.7516       | nm             | $\beta$                | 90       | deg.     |                                           |
| <i>c</i>          | 0.9212       | nm             | $\gamma$               | 90       | deg.     |                                           |
| Element           | Multiplicity | Wyckoff Letter | Fractional Coordinates |          |          | Magnetic Moment<br>/ $\mu_B$              |
|                   |              |                | <i>x</i>               | <i>y</i> | <i>z</i> |                                           |
| Bi1               | 1            | <i>a</i>       | 0.0000                 | 0.0000   | 0.4375   | -0.0170                                   |
| Bi2               | 2            | <i>c</i>       | 0.5000                 | 0.0000   | 0.4293   | -0.0155                                   |
| Bi3               | 2            | <i>c</i>       | 0.5000                 | 0.0000   | 0.9293   | 0.0155                                    |
| Bi4               | 1            | <i>b</i>       | 0.5000                 | 0.5000   | 0.9375   | 0.0170                                    |
| La1               | 1            | <i>a</i>       | 0.0000                 | 0.0000   | 0.9446   | -0.0270                                   |
| La2               | 1            | <i>b</i>       | 0.5000                 | 0.5000   | 0.4446   | 0.0270                                    |
| Fe1               | 4            | <i>d</i>       | 0.2485                 | 0.2485   | 0.2186   | -4.2127                                   |
| Fe2               | 4            | <i>d</i>       | 0.2515                 | 0.2515   | 0.7186   | 4.2127                                    |
| O1                | 4            | <i>d</i>       | 0.2259                 | 0.2259   | 0.0215   | -0.1430                                   |
| O2                | 4            | <i>e</i>       | 0.2420                 | 0.0000   | 0.2974   | -0.1098                                   |
| O3                | 4            | <i>d</i>       | 0.2741                 | 0.2741   | 0.5215   | 0.1430                                    |
| O4                | 4            | <i>e</i>       | 0.2634                 | 0.0000   | 0.7710   | 0.1350                                    |
| O5                | 4            | <i>f</i>       | 0.2366                 | 0.5000   | 0.2710   | -0.1350                                   |
| O6                | 4            | <i>f</i>       | 0.2581                 | 0.5000   | 0.7974   | 0.1098                                    |

**Table S14.** Structural parameters of the tetragonal (Bi<sub>5</sub>La<sub>3</sub>)Fe<sub>8</sub>O<sub>24</sub> cell (space group  $P4mm$ ) with an antiferromagnetic spin configuration.

| Lattice Parameter |              |                |                        |        |        |                                           |
|-------------------|--------------|----------------|------------------------|--------|--------|-------------------------------------------|
| $a$               | 0.7805       | nm             | $\alpha$               | 90     | deg.   | Density / Mg m <sup>-3</sup><br><br>7.967 |
| $b$               | 0.7805       | nm             | $\beta$                | 90     | deg.   |                                           |
| $c$               | 0.7844       | nm             | $\gamma$               | 90     | deg.   |                                           |
| Element           | Multiplicity | Wyckoff Letter | Fractional Coordinates |        |        | Magnetic Moment<br>/ $\mu_B$              |
|                   |              |                | $x$                    | $y$    | $z$    |                                           |
| Bi1               | 1            | $a$            | 0.0000                 | 0.0000 | 0.4738 | -0.0140                                   |
| Bi2               | 1            | $a$            | 0.0000                 | 0.0000 | 0.9335 | -0.0110                                   |
| Bi3               | 2            | $c$            | 0.5000                 | 0.0000 | 0.4573 | -0.0065                                   |
| Bi4               | 1            | $b$            | 0.5000                 | 0.5000 | 0.9599 | 0.0170                                    |
| La1               | 2            | $c$            | 0.5000                 | 0.0000 | 0.9755 | 0.0000                                    |
| La2               | 1            | $b$            | 0.5000                 | 0.5000 | 0.4584 | 0.0230                                    |
| Fe1               | 4            | $d$            | 0.2459                 | 0.2459 | 0.2447 | -4.2432                                   |
| Fe2               | 4            | $d$            | 0.2512                 | 0.2512 | 0.7412 | 4.2478                                    |
| O1                | 4            | $d$            | 0.2121                 | 0.2121 | 0.0047 | -0.0460                                   |
| O2                | 4            | $e$            | 0.2418                 | 0.0000 | 0.3078 | -0.1187                                   |
| O3                | 4            | $d$            | 0.2869                 | 0.2869 | 0.5016 | 0.0340                                    |
| O4                | 4            | $e$            | 0.2651                 | 0.0000 | 0.7305 | 0.1378                                    |
| O5                | 4            | $f$            | 0.2186                 | 0.5000 | 0.2307 | -0.1215                                   |
| O6                | 4            | $f$            | 0.2610                 | 0.5000 | 0.8033 | 0.1135                                    |

**Table S15.** Structural parameters of the tetragonal (BiLa)Fe<sub>2</sub>O<sub>6</sub> cell (space group *P4mm*) with an antiferromagnetic spin configuration.

| Lattice Parameters |              |                |                        |          |          |                                           |
|--------------------|--------------|----------------|------------------------|----------|----------|-------------------------------------------|
| <i>a</i>           | 0.5476       | nm             | $\alpha$               | 90       | deg.     | Density / Mg m <sup>-3</sup><br><br>7.669 |
| <i>b</i>           | 0.5476       | nm             | $\beta$                | 90       | deg.     |                                           |
| <i>c</i>           | 0.8024       | nm             | $\gamma$               | 90       | deg.     |                                           |
| Element            | Multiplicity | Wyckoff Letter | Fractional Coordinates |          |          | Magnetic Moment<br>/ $\mu_B$              |
|                    |              |                | <i>x</i>               | <i>y</i> | <i>z</i> |                                           |
| Bi1                | 1            | <i>a</i>       | 0.0000                 | 0.0000   | 0.0580   | 0.013                                     |
| Bi2                | 1            | <i>b</i>       | 0.5000                 | 0.5000   | 0.5580   | -0.013                                    |
| La1                | 1            | <i>a</i>       | 0.0000                 | 0.0000   | 0.5270   | 0.001                                     |
| La2                | 1            | <i>b</i>       | 0.5000                 | 0.5000   | 0.0270   | -0.001                                    |
| Fe1                | 2            | <i>c</i>       | 0.5000                 | 0.0000   | 0.7590   | -4.245                                    |
| Fe2                | 2            | <i>c</i>       | 0.5000                 | 0.0000   | 0.2590   | 4.245                                     |
| O1                 | 2            | <i>c</i>       | 0.5000                 | 0.0000   | 0.9958   | -0.050                                    |
| O2                 | 4            | <i>d</i>       | 0.7427                 | 0.7427   | 0.7296   | -0.121                                    |
| O3                 | 2            | <i>c</i>       | 0.5000                 | 0.0000   | 0.4958   | 0.050                                     |
| O4                 | 4            | <i>d</i>       | 0.7573                 | 0.7573   | 0.2296   | 0.121                                     |

**Table S16.** Structural parameters of the tetragonal (Bi<sub>3</sub>La<sub>5</sub>)Fe<sub>8</sub>O<sub>24</sub> cell (space group *P4mm*) with an antiferromagnetic spin configuration.

| Lattice Parameter |              |                |                        |          |          |                                           |
|-------------------|--------------|----------------|------------------------|----------|----------|-------------------------------------------|
| <i>a</i>          | 0.7820       | nm             | $\alpha$               | 90       | deg.     | Density / Mg m <sup>-3</sup><br><br>7.492 |
| <i>b</i>          | 0.7820       | nm             | $\beta$                | 90       | deg.     |                                           |
| <i>c</i>          | 0.7800       | nm             | $\gamma$               | 90       | deg.     |                                           |
| Element           | Multiplicity | Wyckoff Letter | Fractional Coordinates |          |          | Magnetic Moment<br>/ $\mu_B$              |
|                   |              |                | <i>x</i>               | <i>y</i> | <i>z</i> |                                           |
| Bi1               | 1            | <i>a</i>       | 0.0000                 | 0.0000   | 0.9609   | 0.0170                                    |
| Bi2               | 2            | <i>c</i>       | 0.5000                 | 0.0000   | 0.4493   | -0.0085                                   |
| La1               | 1            | <i>a</i>       | 0.0000                 | 0.0000   | 0.4638   | 0.0180                                    |
| La2               | 2            | <i>c</i>       | 0.5000                 | 0.0000   | 0.9785   | -0.0010                                   |
| La3               | 1            | <i>b</i>       | 0.5000                 | 0.5000   | 0.5020   | -0.0040                                   |
| La4               | 1            | <i>b</i>       | 0.5000                 | 0.5000   | 0.9670   | -0.0160                                   |
| Fe1               | 4            | <i>d</i>       | 0.2531                 | 0.2531   | 0.2457   | -4.2450                                   |
| Fe2               | 4            | <i>d</i>       | 0.2491                 | 0.2491   | 0.7437   | 4.2475                                    |
| O1                | 4            | <i>d</i>       | 0.2835                 | 0.2835   | 0.0029   | -0.0320                                   |
| O2                | 4            | <i>e</i>       | 0.2754                 | 0.0000   | 0.2313   | -0.1190                                   |
| O3                | 4            | <i>d</i>       | 0.2161                 | 0.2161   | 0.5013   | 0.0260                                    |
| O4                | 4            | <i>e</i>       | 0.2409                 | 0.0000   | 0.8012   | 0.1115                                    |
| O5                | 4            | <i>f</i>       | 0.2534                 | 0.5000   | 0.2966   | -0.1283                                   |
| O6                | 4            | <i>f</i>       | 0.2481                 | 0.5000   | 0.7273   | 0.1410                                    |

**Table S17.** Structural parameters of the tetragonal (BiLa<sub>7</sub>)Fe<sub>8</sub>O<sub>24</sub> cell (space group  $P4mm$ ) with an antiferromagnetic spin configuration.

| Lattice Parameter |              |                |                        |        |        |                                           |
|-------------------|--------------|----------------|------------------------|--------|--------|-------------------------------------------|
| $a$               | 0.7818       | nm             | $\alpha$               | 90     | deg.   | Density / Mg m <sup>-3</sup><br><br>7.062 |
| $b$               | 0.7818       | nm             | $\beta$                | 90     | deg.   |                                           |
| $c$               | 0.7742       | nm             | $\gamma$               | 90     | deg.   |                                           |
| Element           | Multiplicity | Wyckoff Letter | Fractional Coordinates |        |        | Magnetic Moment<br>/ $\mu_B$              |
|                   |              |                | $x$                    | $y$    | $z$    |                                           |
| Bi                | 1            | $a$            | 0.0000                 | 0.0000 | 0.9661 | 0.012                                     |
| La1               | 1            | $a$            | 0.0000                 | 0.0000 | 0.4491 | 0.018                                     |
| La2               | 2            | $c$            | 0.5000                 | 0.0000 | 0.4883 | -0.001                                    |
| La3               | 2            | $c$            | 0.5000                 | 0.0000 | 0.9996 | 0.000                                     |
| La4               | 1            | $b$            | 0.5000                 | 0.5000 | 0.4949 | -0.003                                    |
| La5               | 1            | $b$            | 0.5000                 | 0.5000 | 0.9819 | -0.009                                    |
| Fe1               | 4            | $d$            | 0.2520                 | 0.2520 | 0.2464 | -4.244                                    |
| Fe2               | 4            | $d$            | 0.2490                 | 0.2490 | 0.7473 | 4.247                                     |
| O1                | 4            | $d$            | 0.2861                 | 0.2861 | 0.9997 | -0.011                                    |
| O2                | 4            | $e$            | 0.2618                 | 0.0000 | 0.2219 | -0.129                                    |
| O3                | 4            | $d$            | 0.2149                 | 0.2149 | 0.5010 | 0.016                                     |
| O4                | 4            | $e$            | 0.2479                 | 0.0000 | 0.8000 | 0.120                                     |
| O5                | 4            | $f$            | 0.2496                 | 0.5000 | 0.2914 | -0.134                                    |
| O6                | 4            | $f$            | 0.2434                 | 0.5000 | 0.7127 | 0.134                                     |

**Table S18.** Structural parameters of the tetragonal LaFeO<sub>3</sub> cell (space group *P4mm*) with an antiferromagnetic spin configuration.

| Lattice Parameter |              |                |                        |          |          |                              |
|-------------------|--------------|----------------|------------------------|----------|----------|------------------------------|
| <i>a</i>          | 0.3882       | nm             | $\alpha$               | 90       | deg.     | Density / Mg m <sup>-3</sup> |
| <i>b</i>          | 0.3882       | nm             | $\beta$                | 90       | deg.     |                              |
| <i>c</i>          | 0.7734       | nm             | $\gamma$               | 90       | deg.     |                              |
|                   |              |                |                        |          |          | 6.918                        |
| Element           | Multiplicity | Wyckoff Letter | Fractional Coordinates |          |          | Magnetic Moment / $\mu_B$    |
|                   |              |                | <i>x</i>               | <i>y</i> | <i>z</i> |                              |
| La1               | 1            | <i>a</i>       | 0.0000                 | 0.0000   | 0.4959   | 0.000                        |
| La2               | 1            | <i>a</i>       | 0.0000                 | 0.0000   | 0.9959   | 0.000                        |
| Fe1               | 1            | <i>b</i>       | 0.5000                 | 0.5000   | 0.2485   | -4.248                       |
| Fe2               | 1            | <i>b</i>       | 0.5000                 | 0.5000   | 0.7485   | 4.248                        |
| O1                | 1            | <i>b</i>       | 0.5000                 | 0.5000   | 0.9992   | -0.002                       |
| O2                | 2            | <i>c</i>       | 0.5000                 | 0.0000   | 0.2500   | -0.129                       |
| O3                | 1            | <i>b</i>       | 0.5000                 | 0.5000   | 0.4992   | 0.002                        |
| O4                | 2            | <i>c</i>       | 0.5000                 | 0.0000   | 0.7500   | 0.129                        |

**Table S19.** Structural parameters of the orthorhombic BiFeO<sub>3</sub> cell (space group  $P2_1/m$ ) with an antiferromagnetic spin configuration.

| Lattice Parameter |              |                |                        |        |        |                                       |
|-------------------|--------------|----------------|------------------------|--------|--------|---------------------------------------|
| $a$               | 0.5598       | nm             | $\alpha$               | 90     | deg.   | Density / Mg m <sup>-3</sup><br>8.836 |
| $b$               | 0.7765       | nm             | $\beta$ <sup>1)</sup>  | 90     | deg.   |                                       |
| $c$               | 0.5410       | nm             | $\gamma$               | 90     | deg.   |                                       |
| Element           | Multiplicity | Wyckoff Letter | Fractional Coordinates |        |        | Magnetic Moment<br>/ $\mu_B$          |
|                   |              |                | $x$                    | $y$    | $z$    |                                       |
| Bi1               | 2            | $e$            | 0.5497                 | 0.2500 | 0.4901 | 0.001                                 |
| Bi2               | 2            | $e$            | 0.0495                 | 0.2500 | 0.0098 | -0.001                                |
| Fe1               | 2            | $c$            | 0.0000                 | 0.0000 | 0.5000 | -4.213                                |
| Fe2               | 2            | $b$            | 0.5000                 | 0.0000 | 0.0000 | 4.213                                 |
| O1                | 4            | $f$            | 0.7963                 | 0.4549 | 0.2003 | -0.002                                |
| O2                | 4            | $f$            | 0.2964                 | 0.0448 | 0.2998 | 0.001                                 |
| O3                | 2            | $e$            | 0.9739                 | 0.2500 | 0.5918 | -0.111                                |
| O4                | 2            | $e$            | 0.4734                 | 0.2500 | 0.9082 | 0.111                                 |

<sup>1)</sup> Geometrical optimization calculations were performed in monoclinic  $P2_1/m$  for taking account of the antiferromagnetic spin configuration but the monoclinic angle  $\beta$  was set to 90 deg. and thereby the crystal system can be regarded as orthorhombic

**Table S20.** Structural parameters of the orthorhombic (BiLa)Fe<sub>2</sub>O<sub>6</sub> cell (space group  $P2_1/m$ ) with an antiferromagnetic spin configuration.

| Lattice Parameters |              |                |                        |        |        |                                           |
|--------------------|--------------|----------------|------------------------|--------|--------|-------------------------------------------|
| $a$                | 0.5558       | nm             | $\alpha$               | 90     | deg.   | Density / Mg m <sup>-3</sup><br><br>7.807 |
| $b$                | 0.7806       | nm             | $\beta$ <sup>1)</sup>  | 90     | deg.   |                                           |
| $c$                | 0.5448       | nm             | $\gamma$               | 90     | deg.   |                                           |
| Element            | Multiplicity | Wyckoff Letter | Fractional Coordinates |        |        | Magnetic Moment                           |
|                    |              |                | $x$                    | $y$    | $z$    | / $\mu_B$                                 |
| Bi                 | 2            | $e$            | 0.0470                 | 0.2500 | 0.0081 | -0.002                                    |
| La                 | 2            | $e$            | 0.5404                 | 0.2500 | 0.4908 | -0.001                                    |
| Fe1                | 2            | $c$            | 0.0000                 | 0.0000 | 0.5000 | -4.207                                    |
| Fe2                | 2            | $b$            | 0.5000                 | 0.0000 | 0.0000 | 4.208                                     |
| O1                 | 4            | $f$            | 0.7913                 | 0.4549 | 0.2086 | -0.004                                    |
| O2                 | 4            | $f$            | 0.2929                 | 0.0374 | 0.2941 | 0.003                                     |
| O3                 | 2            | $e$            | 0.9857                 | 0.2500 | 0.5877 | -0.113                                    |
| O4                 | 2            | $e$            | 0.4728                 | 0.2500 | 0.9251 | 0.117                                     |

<sup>1)</sup> Geometrical optimization calculations were performed in monoclinic  $P2_1/m$  for taking account of the antiferromagnetic spin configuration but the monoclinic angle  $\beta$  was set to 90 deg. and thereby the crystal system can be regarded as orthorhombic

**Table S21.** Structural parameters of the orthorhombic LaFeO<sub>3</sub> cell (space group  $P2_1/m$ ) with an antiferromagnetic spin configuration.

| Lattice Parameter |              |                |                        |        |        |                                           |
|-------------------|--------------|----------------|------------------------|--------|--------|-------------------------------------------|
| $a$               | 0.5514       | nm             | $\alpha$               | 90     | deg.   | Density / Mg m <sup>-3</sup><br><br>6.817 |
| $b$               | 0.7790       | nm             | $\beta$ <sup>1)</sup>  | 90     | deg.   |                                           |
| $c$               | 0.5507       | nm             | $\gamma$               | 90     | deg.   |                                           |
| Element           | Multiplicity | Wyckoff Letter | Fractional Coordinates |        |        | Magnetic Moment                           |
|                   |              |                | $x$                    | $y$    | $z$    | / $\mu_B$                                 |
| La1               | 2            | $e$            | 0.4699                 | 0.2500 | 0.5070 | 0.002                                     |
| La2               | 2            | $e$            | 0.9697                 | 0.2500 | 0.9929 | -0.002                                    |
| Fe1               | 2            | $c$            | 0.0000                 | 0.0000 | 0.5000 | -4.202                                    |
| Fe2               | 2            | $b$            | 0.5000                 | 0.0000 | 0.0000 | 4.202                                     |
| O1                | 4            | $f$            | 0.7810                 | 0.9593 | 0.2196 | -0.003                                    |
| O2                | 4            | $f$            | 0.2809                 | 0.5415 | 0.2802 | 0.003                                     |
| O3                | 2            | $e$            | 0.0159                 | 0.2500 | 0.4224 | -0.120                                    |
| O4                | 2            | $e$            | 0.5144                 | 0.2500 | 0.0776 | 0.120                                     |

<sup>1)</sup> Geometrical optimization calculations were performed in monoclinic  $P2_1/m$  for taking account of the antiferromagnetic spin configuration but the monoclinic angle  $\beta$  was set to 90 deg. and thereby the crystal system can be regarded as orthorhombic
